# Supplementary material
Source: HighWire-hosted journal article supplement (https://thorax.bmj.com/content/thoraxjnl-2019-213878)
Supplement: inline-supplementary-material-5 [file inline-supplementary-material-5.pdf]

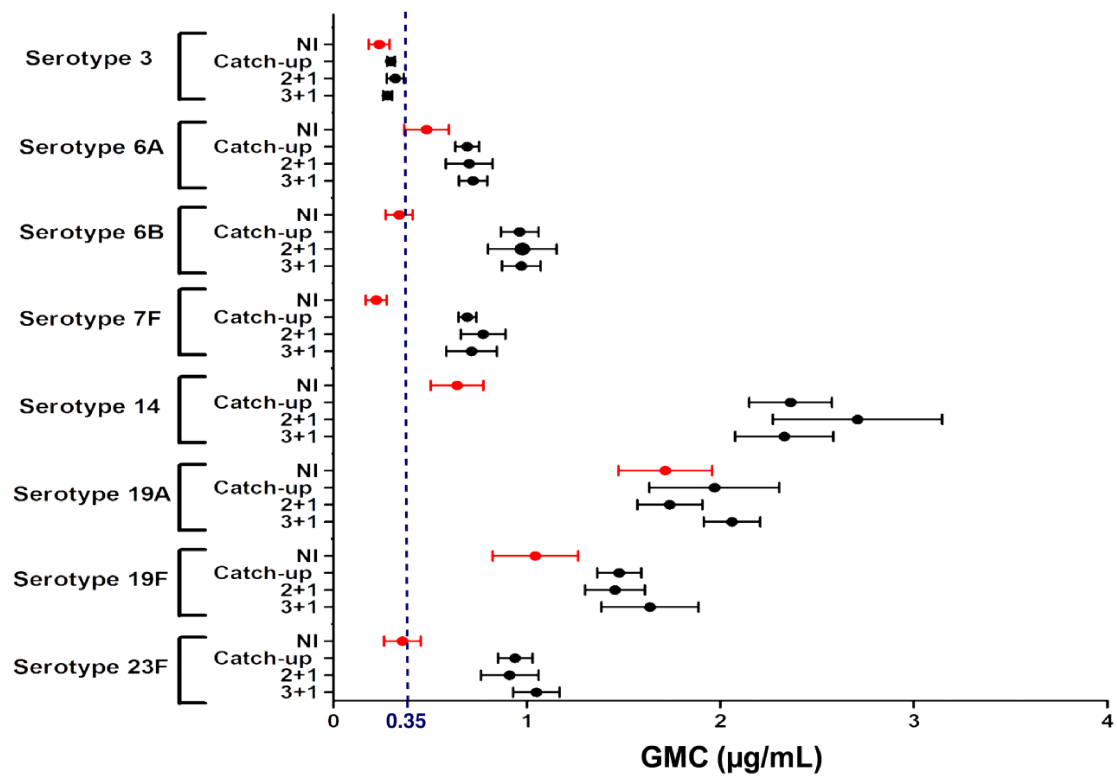

**Supplementary figure S2** Pneumococcal serotype-specific IgG (geometric mean concentrations with 95% CI, µg/ml) in children after PCV13 vaccination with catch-up (1-2 doses), 2+1, and 3+1 schedules. NI represents non-immunized children group.
